# Supplementary material
Source: HighWire-hosted journal article supplement (https://bmjopen.bmj.com/content/10/9/e038623)
Supplement: inline-supplementary-material-1 [file inline-supplementary-material-1.pdf]

2019年9月8日 ver. 1.0

## 説明文書

### 課題名「北陸プラス家族性高コレステロール血症登録観察研究」

今から、あなたにこの研究の内容について説明させていただきます。この説明文書は、私たちの説明をおぎない、あなたの理解を深めるためのものですのでよく読まれて、研究に参加いただけるかどうかご検討ください。

なお、この研究に参加されるかどうかはあなたの自由です。研究に参加した後でも、いつでも自由にやめることができます。もし断ったとしても、あなたのこれからの治療に差し支えることは全くありません。

この研究に参加されるかどうかを決めていただくためには、あなたに研究の内容についてできるだけ多く知っていただくことが必要です。説明の中でわかりにくい言葉や疑問、質問がありましたらどんなことでも遠慮なくお尋ねください。

### 臨床研究とは？

人を対象として行われる医学研究のことです。病気の予防・診断・治療方法の改善や病気の原因の解明、患者さんの生活の質の向上を目的として行われます。ここでは、長時間かけて発症する病気や、稀にしか見られない病気も対象になりますし、すでに行われている治療の効果やその予後を観察していくこともあります。医療に活用できる確かな情報とするため、患者さんにご協力いただいて行われるのが臨床研究です。

この臨床研究は参加された方の安全や人権を守るために、国が定めた基準に従って行われます。また、当院の臨床試験審査委員会で審査を受け、既に承認されています。

2019年9月8日 ver. 1.0

## □ 1. あなたの病気とその治療法について

### 家族性高コレステロール血症の患者様

家族性高コレステロール血症は、遺伝的に LDL コレステロールが非常に高く、そのために冠動脈疾患（心筋梗塞や狭心症）に罹患する可能性が極めて高い疾患です。このような患者様において、動脈硬化性疾患の発症リスクは一様ではなく、個体差があります。このような高リスクの患者様においての動脈硬化性疾患の発症に関する個体差については、未だに明確であるとは言えません。

## □ 2. 今回の研究について（研究の目的について）

欧米諸国では、家族性高コレステロール血症に対してのレジストリー（同じ病気の方のデータベース）を作成したうえで、まとめて臨床情報などの解析を行うことで効率よくこの病気の方の診断・治療などの研究が行われています。これにより新たな知見も生まれていますが、我が国においてのこの病気のレジストリーは殆どありません。金沢大学附属病院及びその関連病院では、この病気の患者様を数多く診療してきた実績から、この研究において我が国で最大規模のデータベースを作成し、この疾患での動脈硬化性疾患発症をさらに抑制することを目的としています。

## □ 3. 研究の方法について

- ① この研究の実施には、家族性高コレステロール血症と診断された患者様の電子カルテ情報を使用させていただきます。具体的には通常診療におけるコレステロール値などの採血データ、動脈硬化発症に関わると考えられる臨床情報（高血圧症や糖尿病の有無等）にくわえて、動脈硬化性疾患の罹患、悪性疾患（癌など）罹患について通常診療で得られた臨床情報を調査します。
- ② 集計されたデータは学会発表、学術論文や日本動脈硬化学会や日本循環器学会などのホームページなどでまとめて公表されることがありますが、個人個人の情報については公表されることはありません。

### ① 研究期間

倫理委員会承認後～ 2024年3月31日(西暦)

### ③ 予定症例数 1,000例

## □ 4. 予想される利益(効果)と不利益(副作用)について

この研究は観察研究であり、この研究に伴う利益(効果)は有りません。不利益(副作用)は、個人情報漏洩の危険性が無いとは言えません。

## □ 5. 健康被害が発生した場合について

この研究は観察研究であり、この研究に伴う健康被害が生じる事は有りません。

## □ 6. 研究を中止する場合について

2019年9月8日 ver. 1.0

- ① あなたが参加の中止を希望した場合あるいは同意の撤回をした場合
- ② 担当医師が研究の継続が不相当であると判断した場合
- ③ その他金沢大学倫理委員会により研究の中止を勧告された場合

## 7. プライバシーの保護について

この研究で得られた結果は学会や医学雑誌等に発表されることがあります。このような場合、あなたの個人情報などのプライバシーに関するものが公表されることは一切ありません。

## 8. 研究参加に伴う費用負担について

この研究に参加する事による新たな費用は発生しません。

## 9. 特許について

本研究成果は金沢大学に帰属します。

## 10. 結果の公表について

研究成果は国内外の学会及び学術誌に公表する予定ですが、個人情報などが公表されることは決してありません。

## 11. 資金源等について

この研究は、研究グループの自己資金により行われますので、企業等との利益相反などは一切ありません。

## 12. 研究への参加の自由と同意撤回の自由について

この研究に参加するかどうかについては、よく考えていただき、あなた自身の自由な意思でお決めください。また、研究に参加することに同意された後、もしくは研究が始まった後でもいつでも同意を取り下げることができます。もし、お断りになっても、あなたのこれからの治療に差し支えることは一切ありません。ただし、研究が開始された後に同意を取り下げた場合には、それまでに得られた結果については、改めて承諾を得た上で使用させていただきます。

## 13. 研究に関する窓口

この研究の内容について、わからない言葉や、疑問、質問、もう一度聞きたいこと、更に詳細な情報を知りたいなどがありましたら、遠慮せずいつでもお尋ねください。研究が始まった後でも、わからないことや心配なことがありましたら、いつでも遠慮なく私たちにご連絡ください。

2019年9月8日 ver. 1.0

## 金沢大学

代表研究者・研究責任者: 多田隼人 金沢大学附属病院 救急部 助教  
研究分担者: 高村雅之 金沢大学医学系 循環器内科学 教授  
研究分担者: 川尻剛照 金沢大学医学系 循環器内科学 准教授  
研究分担者: 藤野 陽 金沢大学保健学系 准教授  
研究分担者: 古荘浩司 金沢大学保健学系 准教授  
研究分担者: 林研至 金沢大学附属病院 検査部 助教  
研究分担者: 坂田憲治 金沢大学附属病院 循環器内科 講師  
研究分担者: 薄井荘一郎 金沢大学附属病院 循環器内科 講師  
研究分担者: 村井久純 金沢大学附属病院 循環器内科 助教  
研究分担者: 高島伸一郎 研究分担者: 金沢大学附属病院 救急部 助教  
研究分担者: 加藤武史 金沢大学大学院先進予防医学研究科 特任准教授  
研究分担者: 中西千明 金沢大学附属病院 循環器内科 助教  
研究分担者: 津田豊暢 金沢大学附属病院 循環器内科 助教  
研究分担者: 森三佳 金沢大学附属病院 検査部 特任助教  
研究分担者: 野村章洋 金沢大学附属病院先端医療開発センター 特任助教  
研究分担者: 吉田昌平 金沢大学附属病院 循環器内科 助教  
研究分担者: 下島正也 金沢大学附属病院 救急部 特任助教  
研究分担者: 岡田寛史 金沢大学附属病院 救急部 特任助教

あなたの担当医師: \_\_\_\_\_

電話: 076-265-2000(代表)

相談窓口: 研究実施診療科の連絡先 電話: 076-265-2251

以上、この研究の内容について十分ご理解いただいたうえで、参加していただける場合は、最終ページの同意文書に同意年月日の記載と署名をしてご提出ください。署名していただきました同意文書は、あなたと病院がそれぞれ保管することになります。

この説明文書と同意文書(患者さん控え)を大切に保管しておいてください。

2019年9月8日 ver. 1.0

## 同意文書

金沢大学附属病院長 殿

私は「北陸プラス家族性高コレステロール血症レジストリー研究」の研究に参加するにあたり、説明文書を受け取り、以下の内容について説明を受けました。

本研究の内容(目的と方法など)を十分に理解しましたので、今回の研究に参加することについて私の自由意思にもとづいて

同意いたします。      同意しません。

- 1. あなたの病気とその治療法について
- 2. 今回の研究について(研究の目的について)
- 3. 研究の方法について
- 4. 予想される利益(効果)と不利益(副作用)について
- 5. 健康被害が発生した場合について
- 6. 研究を中止する場合について
- 7. プライバシーの保護について
- 8. 研究参加に伴う費用負担について
- 9. 特許について
- 10. 結果の公表について
- 11. 資金源等について
- 12. 研究への参加の自由と同意撤回の自由について
- 13. 研究に関する窓口

同意日:令和    年    月    日  
ご本人 氏名

〒    -  
現住所

代諾者 氏名

〒    -      続柄 (      )  
現住所

説明日:令和    年    月    日

所属

研究責任(分担)医師名
